# Supplementary material for: RTK-Dependent Inducible Degradation of Mutant PI3Kα Drives GDC-0077 (Inavolisib) Efficacy
Source: PubMed Central journal article supplement — Cancer Discov. 2021 Sep 20;12(1):204–19. doi: 10.1158/2159-8290.CD-21-0072 (PMC9762331; doi:10.1158/2159-8290.cd-21-0072), 2021-09-20
Supplement: cd-21-0072_figure_s2_suppsf2.pdf [file cd-21-0072_figure_s2_suppsf2.pdf]

Figure S2

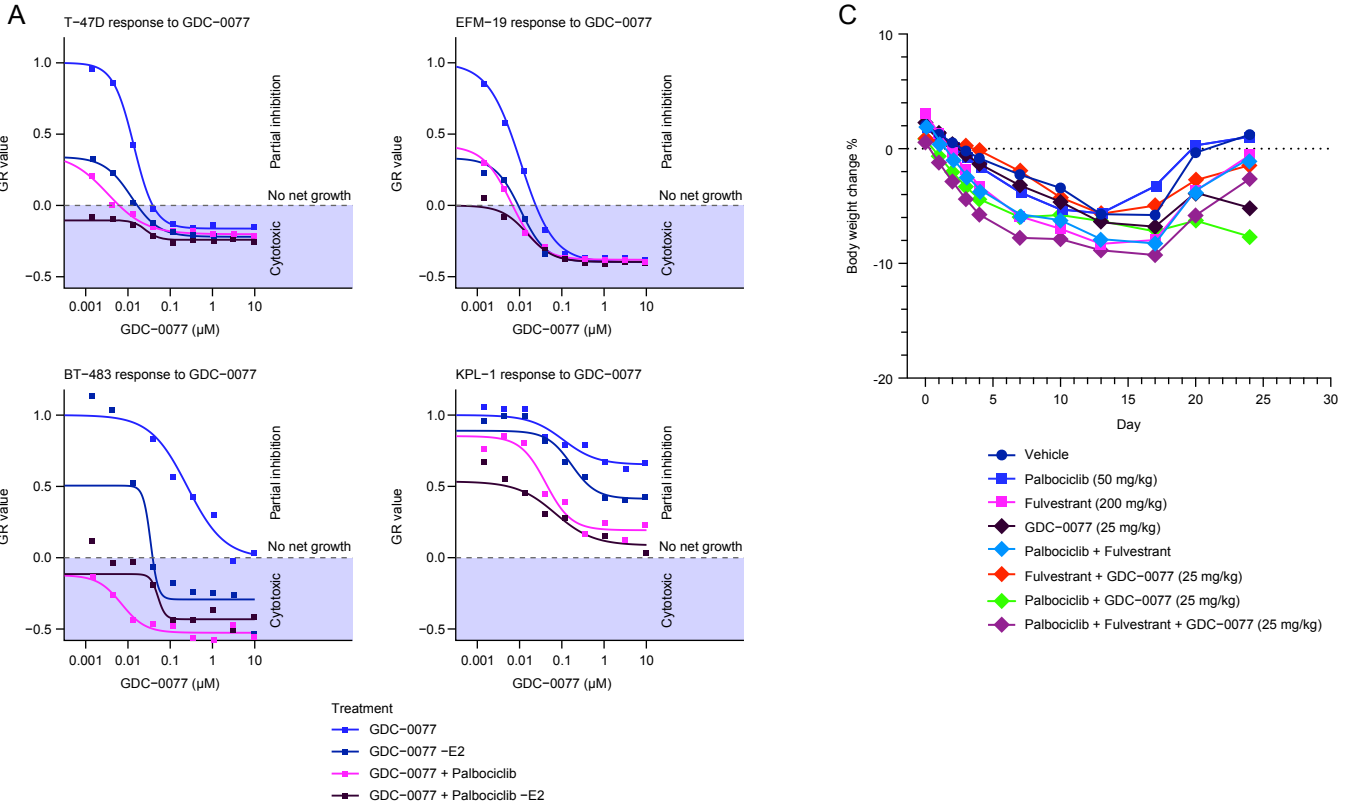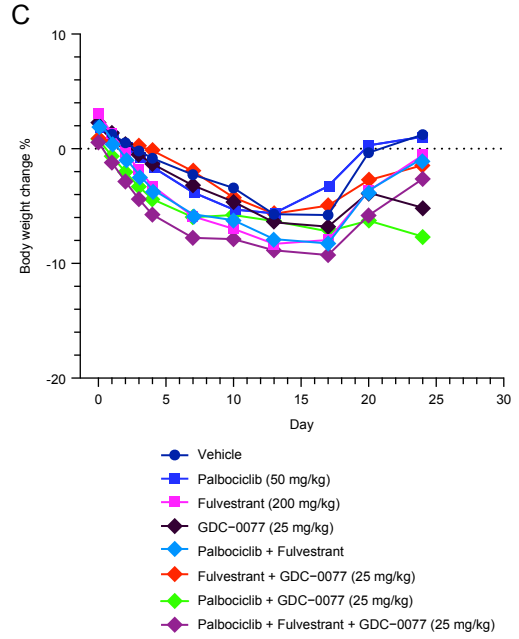

**Individual tumor volumes and body weights**

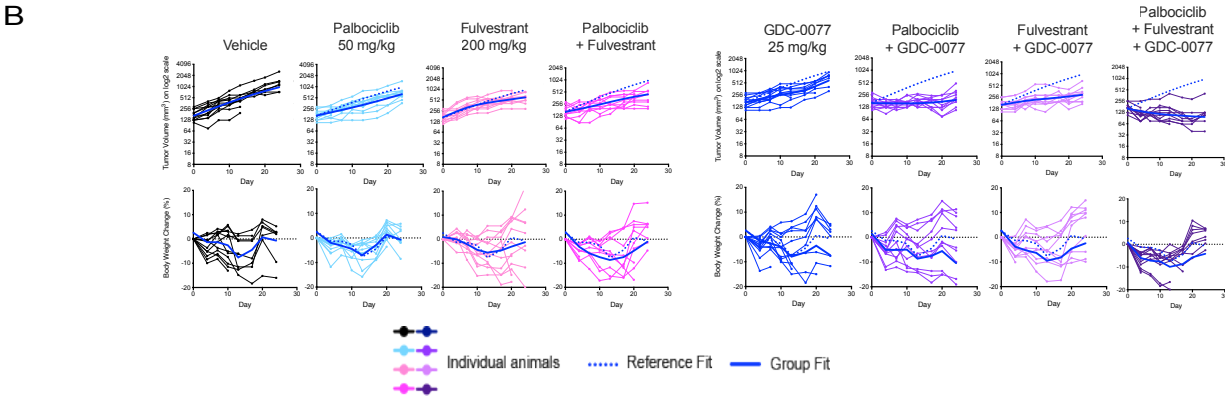

**D** Combination of Palbociclib Taselisib in the WHIM20 (erR1Y537S, PI3KE542K-/-) breast cancer xenograft

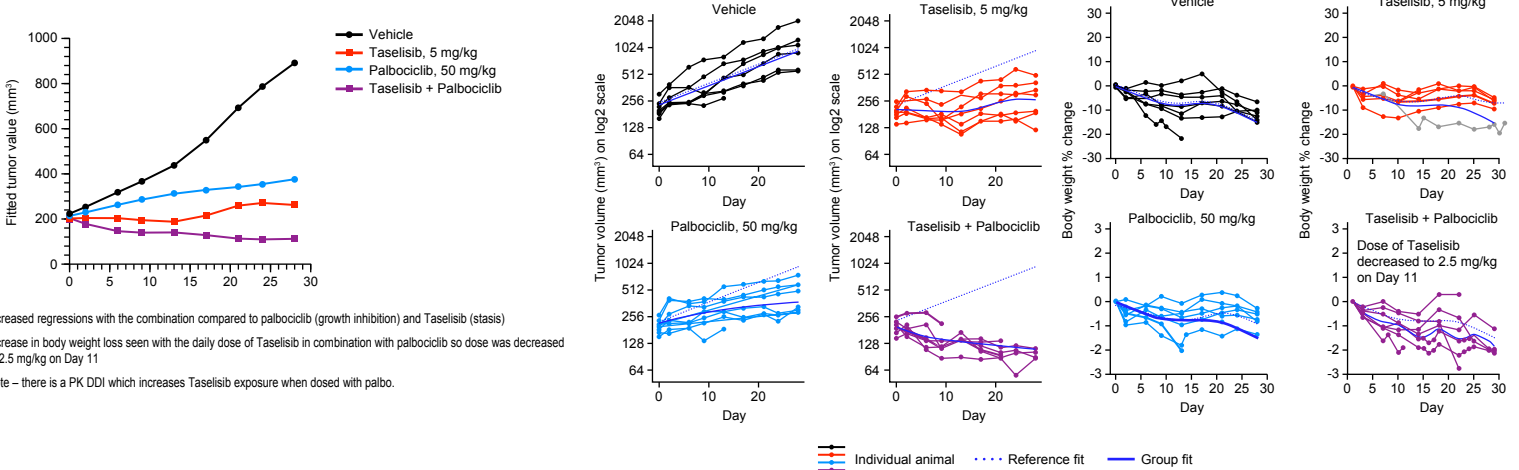

## Figure S2

### Activity of GDC-0077 in combination with Palbociclib and/ or Fulvestrant

(A) Dose response curve of hormone receptor (HR)-positive/HER2-negative breast cancer lines treated with GDC-0077 either alone (blue), without E2 to mimic aromatase inhibitor (dark blue), with palbociclib at 0.15 $\mu$ M (purple), or with palbociclib at 0.15  $\mu$ M (purple) and without E2 (dark purple). Negative values indicate a cytotoxic response. y-axis shows normalized growth inhibition (GR value).

(B) Individual animal data with fits of palbociclib, fulvestrant and GDC-0077 as single agent or in combination in MCF7 xenografts.

(C) Weight loss for MCF-7 xenograft experiment.

(D) Efficacy and weight loss for WHIM20 xenograft experiment.
