# Supplementary material for: RTK-Dependent Inducible Degradation of Mutant PI3Kα Drives GDC-0077 (Inavolisib) Efficacy
Source: PubMed Central journal article supplement — Cancer Discov. 2021 Sep 20;12(1):204–19. doi: 10.1158/2159-8290.CD-21-0072 (PMC9762331; doi:10.1158/2159-8290.cd-21-0072), 2021-09-20
Supplement: cd-21-0072_figure_s3_suppsf3.pdf [file cd-21-0072_figure_s3_suppsf3.pdf]

Figure S3

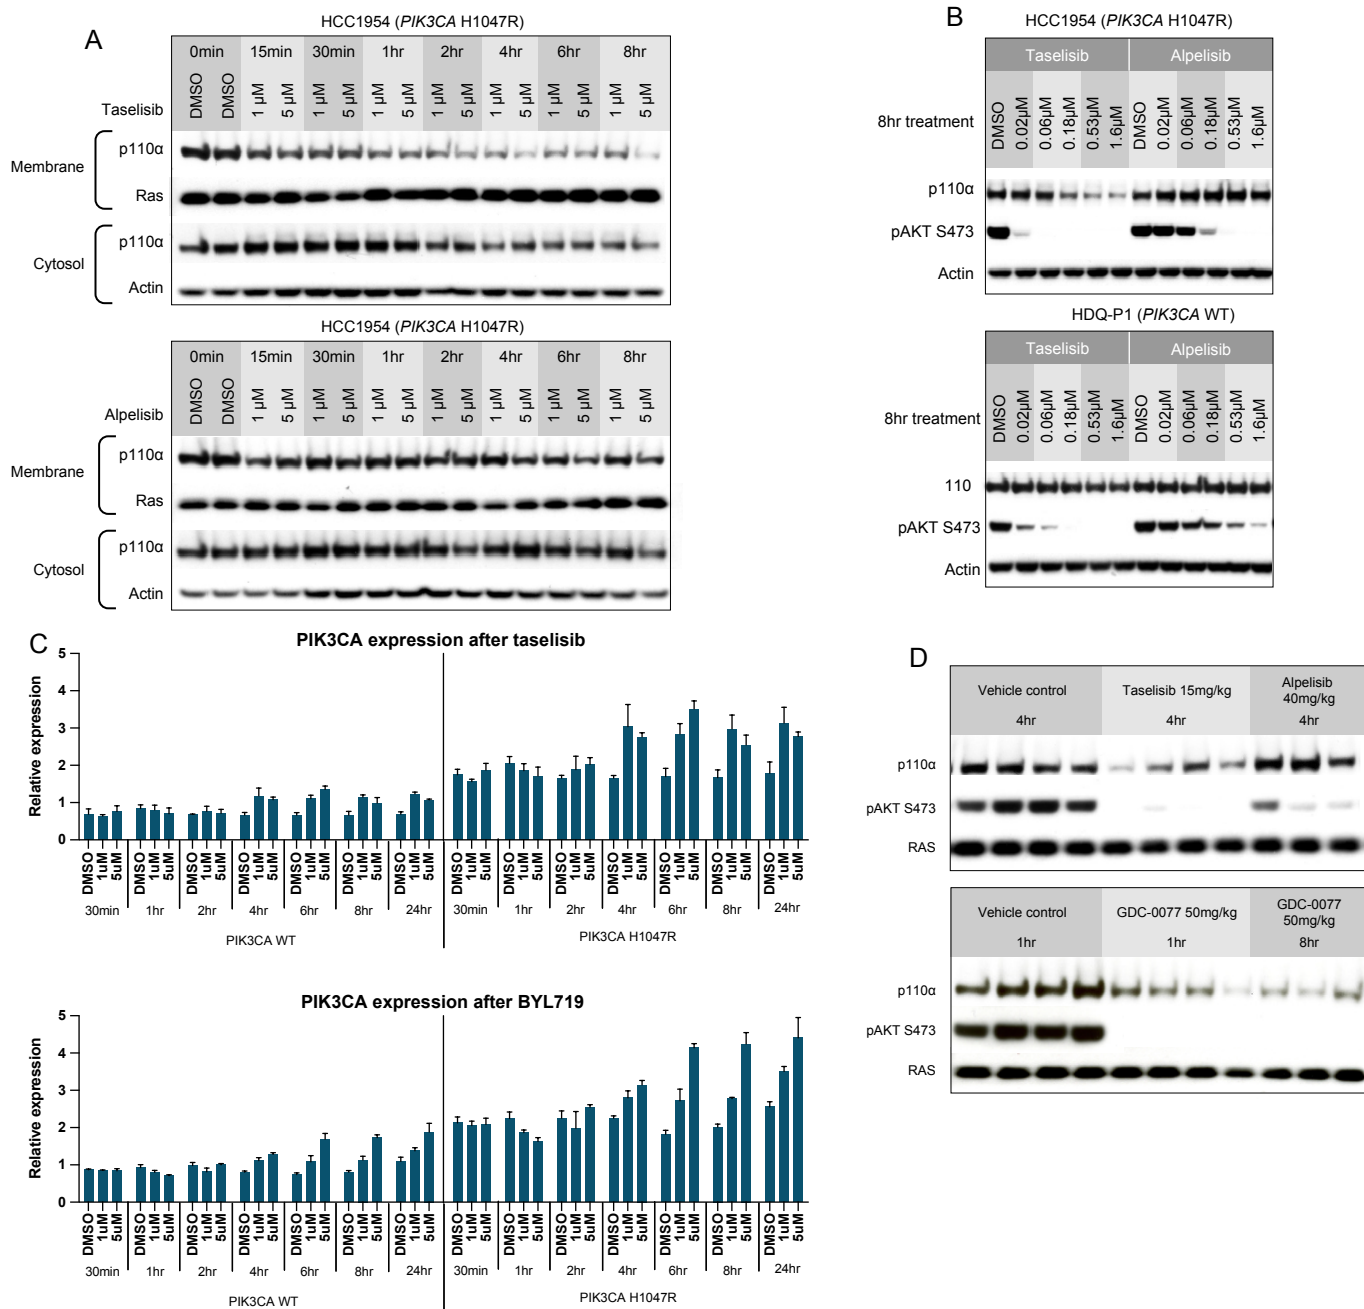

### **Figure S3**

#### **Taselisib and GDC-0077 induce mutant p110 $\alpha$ and not WT p110 $\alpha$ degradation**

(A) Subcellular fractionation of HCC1954 PIK3CA H1047R mutant cells treated with PI3K inhibitors taselisib or BYL719 for up to 8 hours, followed by p110 $\alpha$  western blot.

(B) Taselisib and BYL719 treatment for 8 hours in HCC1954 PIK3CA H1047R mutant cells and HDQ-P1 PIK3CA-wild-type cells.

(C) Quantitative RT-PCR shows no reduction in PIK3CA RNA expression in HCC1954 cells treated with taselisib or BYL719 for up to 24 hours. Error bars are standard deviation of triplicates.

(D) Membrane-associated p110 $\alpha$  expression following single oral dose of 15 mg/kg taselisib, 40 mg/kg BYL719, or 50 mg/kg GDC-0077 treatment in HCC1954 xenograft tumors.
