# Supplementary material for: RTK-Dependent Inducible Degradation of Mutant PI3Kα Drives GDC-0077 (Inavolisib) Efficacy
Source: PubMed Central journal article supplement — Cancer Discov. 2021 Sep 20;12(1):204–19. doi: 10.1158/2159-8290.CD-21-0072 (PMC9762331; doi:10.1158/2159-8290.cd-21-0072), 2021-09-20
Supplement: cd-21-0072_figure_s4_suppsf4.pdf [file cd-21-0072_figure_s4_suppsf4.pdf]

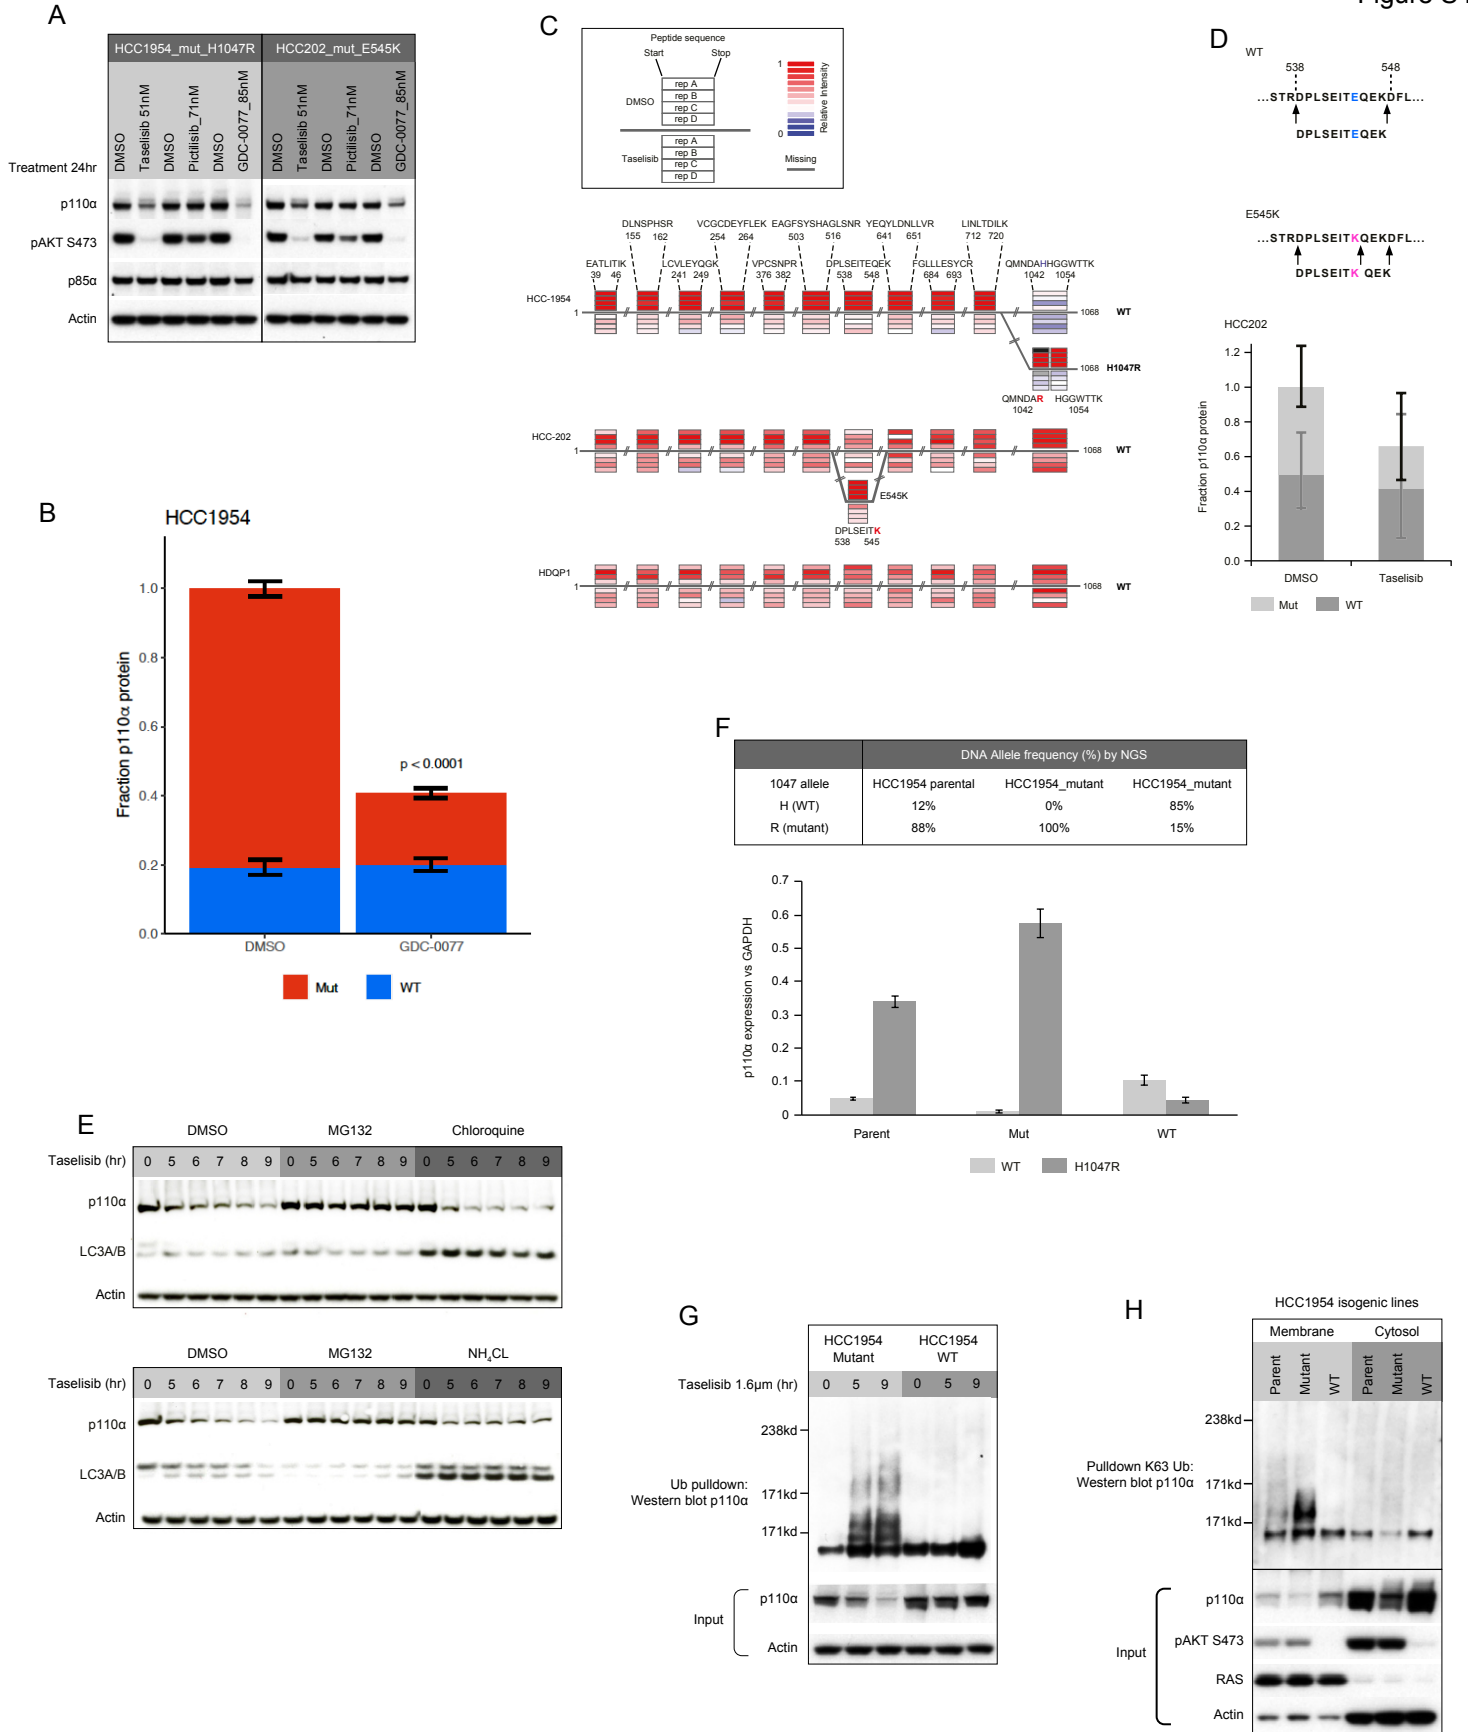

## Figure S4

### Taselisib depletes mutant p110 $\alpha$ protein through ubiquitin and proteasome mechanism in a dose and time dependent manner

(A) PIK3CA-mutant cells were treated with PI3K inhibitors at concentrations relevant to plasma concentrations achieved with clinically administered doses for pictilisib (GDC-0941) (330 mg), taselisib (6 mg), and GDC-0077 (9 mg).

(B) Mass spectrometry of HCC1954 cells treated for 24 hours with 500 nM GDC-0077. A neo tryptic peptide generated from PIK3CA H1047R was used to assess mutant protein levels compared to wild-type protein in the same lysate.

(C) Quantitative mass spectrometry analysis of p110 $\alpha$  levels in HCC1954, HCC202 and HDQP1 cells treated with either DMSO or 500 nM taselisib for 24 hours (n=4). For each cell line, the relative abundance of peptides from loci spanning the protein are compared between DMSO (above line) and taselisib-treated (below line) cells. For mutant loci (H1047R in HCC1954 cells, E545K in HCC202 cells), the protein sequence is split to depict the wild-type and mutant-specific peptides in parallel.

(D) Mass spectrometry analysis of peptides representing wild-type and E545K mutant p110 $\alpha$  from HCC202 breast cancer cells treated for 24 hours with either DMSO or 500 nM taselisib. The neo tryptic peptide generated from p110 $\alpha$  E545K was used to assess mutant protein levels compared to wild-type protein in the same lysate (n=4).

(E) Lysosomotropic agents chloroquine and ammonium chloride (NH<sub>4</sub>Cl) do not rescue p110 $\alpha$  degradation induced by 1.6  $\mu$ M taselisib in HCC1954 cells.

(F) NGS and qRT-PCR for allele-specific mRNA expression in HCC1954 parental and isogenic HCC1954\_mutant and HCC1954\_wild-type cells. Error bars are standard deviation of triplicates.

(G) HCC1954\_mutant and HCC1954\_wild-type isogenic cells were treated with 1.6  $\mu$ M taselisib for up to 9 hours. Pull down of ubiquitinated protein was followed by western blotting with anti p110 $\alpha$  antibody.

(H) Subcellular fractionation of HCC1954\_parental and isogenic HCC1954\_mutant and HCC1954\_WT cells. Pull down of ubiquitinated protein was followed by western blotting with anti-p110 $\alpha$ .
