# Supplementary material for: RTK-Dependent Inducible Degradation of Mutant PI3Kα Drives GDC-0077 (Inavolisib) Efficacy
Source: PubMed Central journal article supplement — Cancer Discov. 2021 Sep 20;12(1):204–19. doi: 10.1158/2159-8290.CD-21-0072 (PMC9762331; doi:10.1158/2159-8290.cd-21-0072), 2021-09-20
Supplement: cd-21-0072_figure_s5_suppsf5.pdf [file cd-21-0072_figure_s5_suppsf5.pdf]

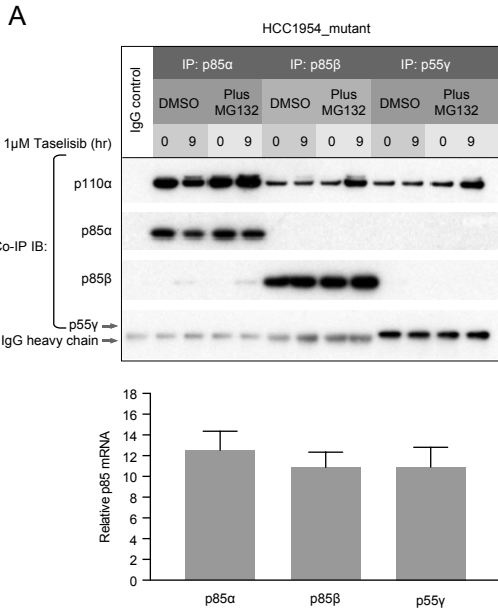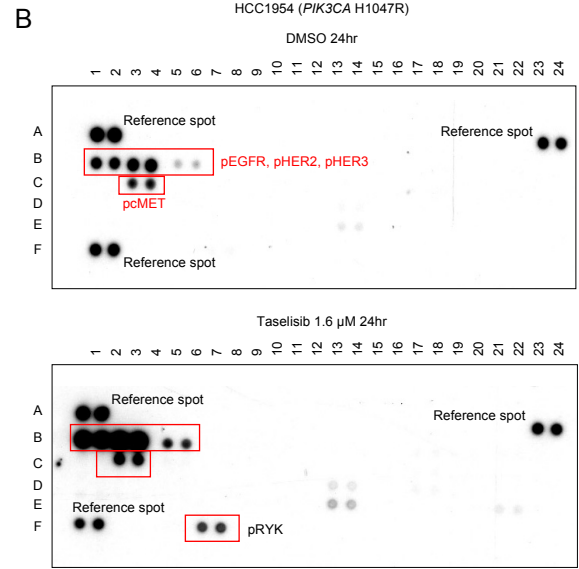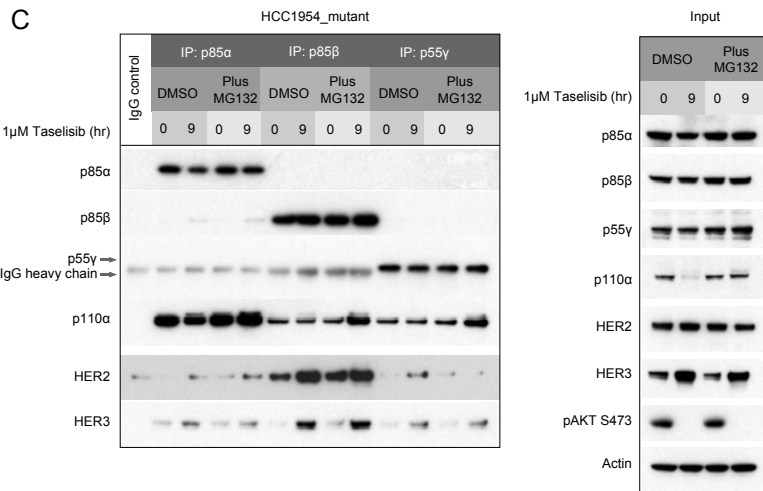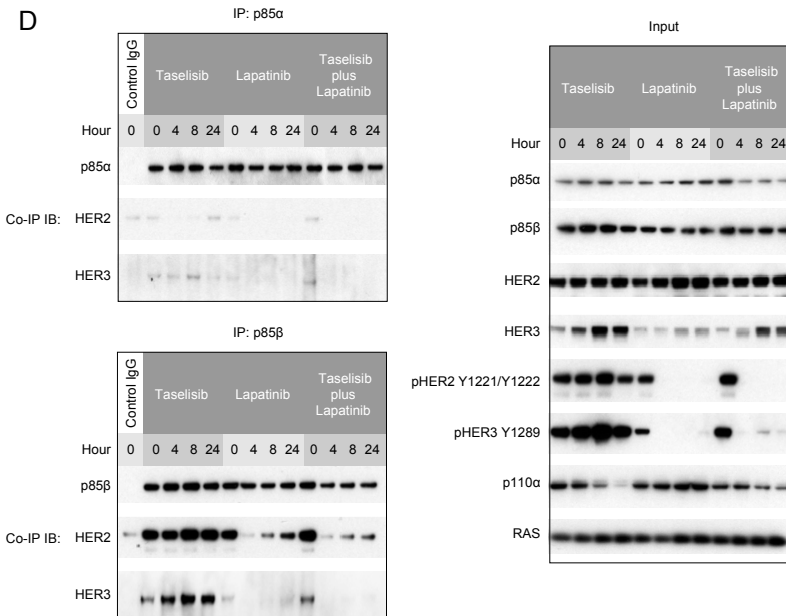

## Figure S5

### **Taselisib-mediated degradation of mutant p110 $\alpha$ occurs preferentially at the plasma membrane.**

(A) HCC1954\_mutant cells were treated with 1  $\mu$ M tselisib alone or combination with proteasome inhibitor MG132. Cell lysates were precipitated with p85 $\alpha$ , p85 $\beta$  or p55 $\gamma$  antibody, followed by immunoblot with antibodies indicated to the left. Real time qPCR assays of the p85 isoforms in RNA collected from untreated cells.

(B) HCC1954 cells were treated with 1.6  $\mu$ M tselisib for 24 hours as indicated. Cell lysates were prepared and total protein were applied to pRTK arrays. Red box indicate RTKs whose phosphorylation was up-regulated following the treatment.

(C) HCC1954\_mutant cell line was treated with 1  $\mu$ M tselisib alone or in combination with proteasome inhibitor MG132. Cell lysates were precipitated with p85 $\alpha$ , p85 $\beta$  or p55 $\gamma$  antibody, followed by immunoblot with antibodies indicated to the left.

(D) HCC1954\_mutant cell line was treated with 1  $\mu$ M tselisib alone or in combination with lapatinib. Cell lysates were precipitated with p85 $\alpha$  or p85 $\beta$  antibody, followed by immunoblot with antibodies indicated to the left.
